# Supplementary material for: Working Memory Performance under a Negative Affect Is More Susceptible to Higher Cognitive Workloads with Different Neural Haemodynamic Correlates
Source: MDPI journal article supplement (doi:10.3390/brainsci11070935), 2021-07-15
Supplement: s1 [file s1]

## Supplementary Material

**Title:** Working Memory Performance under a Negative Affect Is More Susceptible to Higher Cognitive Workloads with Different Neural Haemodynamic Correlates

**Authors:** Y.X. Feng, M. Kiguchi, W.C. Ung, S.C. Dass, A.F.M. Hani, T.B. Tang, E.T.W. Ho\*

**\*Corresponding email:** hotattwei@utp.edu.my

**Supplementary Table S1** – Participants' demographic information

| SubjectID | AffectiveGroup | Age | Ethnicity  | Discipline |
|-----------|----------------|-----|------------|------------|
| S01       | Negative       | 20  | Chinese    | EE Eng     |
| S02       | Neutral        | 19  | Vietnamese | FASc       |
| S03       | Negative       | 21  | Malay      | EE Eng     |
| S04       | Neutral        | 19  | Malay      | BIT        |
| S05       | Negative       | 19  | Chinese    | FASc       |
| S06       | Neutral        | 21  | Malay      | EE Eng     |
| S07       | Negative       | 22  | Chinese    | Chem Eng   |
| S08       | Neutral        | 22  | Indian     | BIT        |
| S09       | Negative       | 21  | Malay      | EE Eng     |
| S10       | Neutral        | 20  | Malay      | Chem Eng   |
| S11       | Negative       | 21  | Malay      | EE Eng     |
| S12       | Neutral        | 19  | Malay      | Chem Eng   |
| S13       | Negative       | 19  | Chinese    | Chem Eng   |
| S14       | Neutral        | 23  | Malay      | FASc       |
| S15       | Negative       | 21  | Malay      | EE Eng     |
| S16       | Neutral        | 19  | Chinese    | Mech Eng   |
| S17       | Negative       | 24  | Chinese    | FASc       |
| S18       | Neutral        | 24  | Chinese    | EE Eng     |
| S19       | Negative       | 21  | Pakistanis | EE Eng     |
| S20       | Neutral        | 22  | Malay      | Chem Eng   |
| S21       | Negative       | 23  | Malay      | EE Eng     |
| S22       | Neutral        | 22  | Malay      | Chem Eng   |
| S23       | Negative       | 19  | Chinese    | Chem Eng   |
| S24       | Neutral        | 21  | Chinese    | EE Eng     |
| S25       | Negative       | 21  | Malay      | EE Eng     |
| S26       | Neutral        | 21  | Chinese    | BIT        |
| S27       | Negative       | 21  | Malay      | EE Eng     |
| S28       | Neutral        | 19  | Chinese    | Chem Eng   |
| S29       | Negative       | 20  | Chinese    | Mech Eng   |
| S30       | Neutral        | 19  | Mixed      | Civil Eng  |
| S31       | Negative       | 20  | Malay      | BIT        |

**Acronyms for discipline of study (in Table S1):**

- i. BIT – Business Information Technology
- ii. Chem Eng – Chemical Engineering
- iii. Civil Eng – Civil Engineering
- iv. EE Eng – Electrical and Electronic Engineering
- v. FASc – Fundamental and Applied Sciences
- vi. Mech Eng – Mechanical Engineering

**Supplementary Figure S1** – (a) Experimental protocol in chronological order with (b) Averaged fNIRS signal analysis block and (c) Task activation block

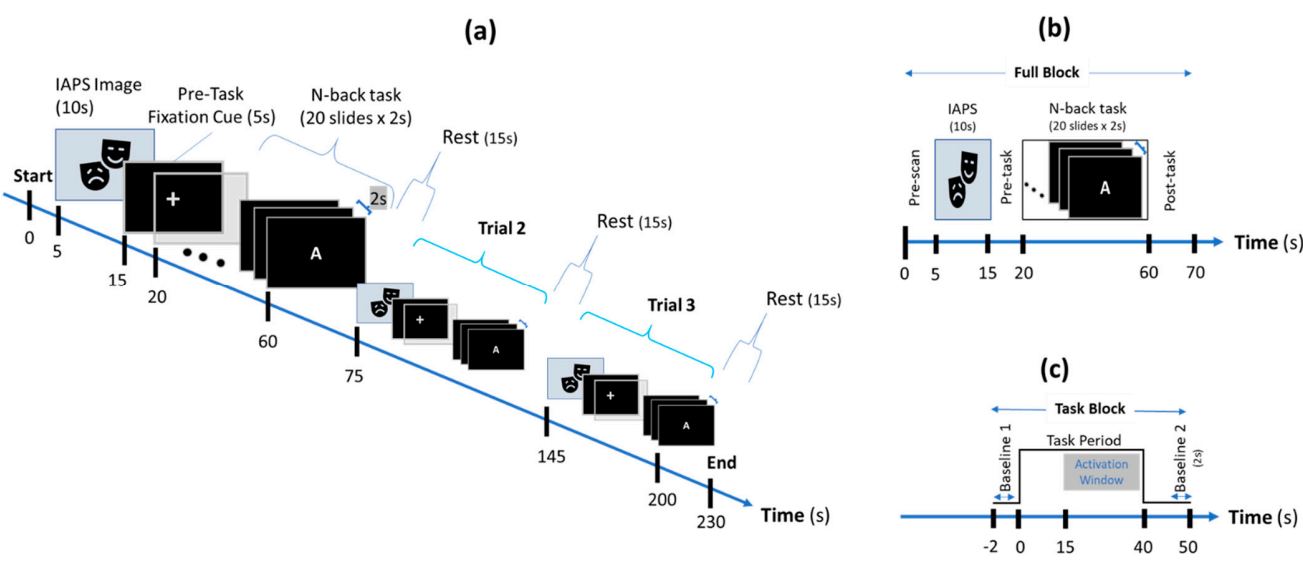

**Supplementary Figure S2** – Layout for fNIRS measuring channels with guidance for placement

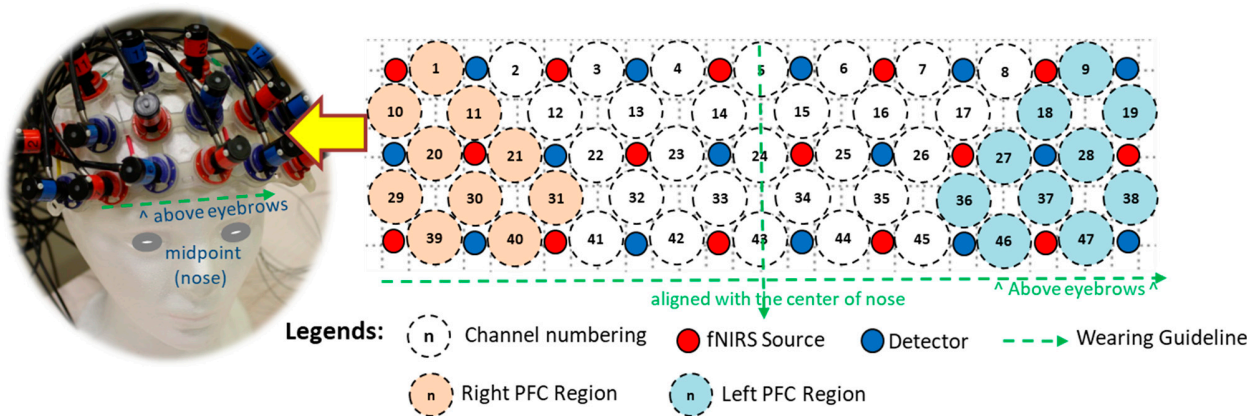

**Supplementary Table S2 – Statistical comparison to indicate significant activated and deactivated fNIRS channels during IAPS presentation and n-back task**

| Neutral Group |         |              |           |              |              |           |              |         |
|---------------|---------|--------------|-----------|--------------|--------------|-----------|--------------|---------|
| Sub-Region    | Chn No. | t-val (IAPS) | df (IAPS) | p-val (IAPS) | t-val (TASK) | df (TASK) | p-val (TASK) | Remarks |
| LRPFC         | 1       | 1.223        | 128       | 0.2237       | 2.784        | 128       | 0.0062       |         |
| FP            | 2       | 5.200        | 134       | 0.0000       | 0.823        | 134       | 0.4118       | A       |
|               | 3       | 4.240        | 125       | 0.0000       | 0.965        | 125       | 0.3362       | A       |
|               | 4       | 4.906        | 128       | 0.0000       | 0.263        | 128       | 0.7930       | A       |
|               | 5       | 5.581        | 125       | 0.0000       | 0.271        | 125       | 0.7869       | A       |
|               | 6       | 5.143        | 134       | 0.0000       | -1.179       | 134       | 0.2405       | A       |
|               | 7       | 5.596        | 134       | 0.0000       | -3.295       | 134       | 0.0013       | A       |
|               | 8       | 5.827        | 119       | 0.0000       | -1.907       | 119       | 0.0589       | A       |
| LRPFC         | 9       | 2.875        | 128       | 0.0047       | 0.204        | 128       | 0.8390       |         |
|               | 10      | -0.330       | 119       | 0.7420       | 5.196        | 119       | 0.0000       | C       |
|               | 11      | -0.426       | 116       | 0.6705       | 4.901        | 116       | 0.0000       | C       |
| FP            | 12      | 3.716        | 134       | 0.0003       | 1.825        | 134       | 0.0702       | A       |
|               | 13      | 4.294        | 134       | 0.0000       | 1.003        | 134       | 0.3178       | A       |
|               | 14      | 5.044        | 134       | 0.0000       | -0.580       | 134       | 0.5631       | A       |
|               | 15      | 5.445        | 131       | 0.0000       | -1.425       | 131       | 0.1566       | A       |
|               | 16      | 5.504        | 134       | 0.0000       | -2.512       | 134       | 0.0132       | A       |
|               | 17      | 4.870        | 125       | 0.0000       | -2.339       | 125       | 0.0209       | A       |
|               | 18      | -0.975       | 116       | 0.3317       | 4.911        | 116       | 0.0000       | C       |
| LRPFC         | 19      | 2.163        | 119       | 0.0326       | 2.907        | 119       | 0.0044       |         |
|               | 20      | -4.695       | 128       | 0.0000       | 6.516        | 128       | 0.0000       | B,C     |
|               | 21      | -1.983       | 134       | 0.0494       | 4.725        | 134       | 0.0000       | C       |
| FP            | 22      | 3.807        | 134       | 0.0002       | 1.355        | 134       | 0.1778       | A       |
|               | 23      | 3.863        | 134       | 0.0002       | 0.364        | 134       | 0.7164       | A       |
|               | 24      | 4.793        | 134       | 0.0000       | -1.357       | 134       | 0.1771       | A       |
|               | 25      | 4.813        | 134       | 0.0000       | -0.959       | 134       | 0.3394       | A       |
|               | 26      | 5.636        | 134       | 0.0000       | -2.031       | 134       | 0.0443       | A       |
| LRPFC         | 27      | -0.427       | 134       | 0.6703       | 3.554        | 134       | 0.0005       | C       |
|               | 28      | -1.906       | 128       | 0.0588       | 4.674        | 128       | 0.0000       | C       |
|               | 29      | -3.159       | 113       | 0.0020       | 7.986        | 113       | 0.0000       | C       |
|               | 30      | -2.470       | 128       | 0.0148       | 4.624        | 128       | 0.0000       | C       |
|               | 31      | 2.206        | 134       | 0.0291       | 2.722        | 134       | 0.0073       |         |
|               | 32      | 3.457        | 134       | 0.0007       | 2.886        | 134       | 0.0046       | A       |
| FP            | 33      | 5.043        | 134       | 0.0000       | -1.514       | 134       | 0.1323       | A       |
|               | 34      | 5.073        | 134       | 0.0000       | -2.095       | 134       | 0.0380       | A       |
|               | 35      | 5.070        | 134       | 0.0000       | -1.112       | 134       | 0.2681       | A       |
|               | 36      | 0.480        | 122       | 0.6318       | 4.044        | 122       | 0.0001       | C       |
| LRPFC         | 37      | -5.070       | 110       | 0.0000       | 4.861        | 110       | 0.0000       | B,C     |
|               | 38      | -1.235       | 125       | 0.2190       | 5.590        | 125       | 0.0000       | C       |
|               | 39      | -0.560       | 131       | 0.5766       | 3.925        | 131       | 0.0001       | C       |
|               | 40      | 1.291        | 128       | 0.1991       | 2.918        | 128       | 0.0042       |         |
| FP            | 41      | 3.605        | 131       | 0.0004       | 3.037        | 131       | 0.0029       | A       |
|               | 42      | 4.827        | 128       | 0.0000       | 0.290        | 128       | 0.7724       | A       |
|               | 43      | 5.059        | 131       | 0.0000       | -1.010       | 131       | 0.3142       | A       |
|               | 44      | 5.531        | 131       | 0.0000       | 0.607        | 131       | 0.5449       | A       |
|               | 45      | 3.835        | 125       | 0.0002       | 2.235        | 125       | 0.0272       | A       |
| LRPFC         | 46      | -0.321       | 125       | 0.7490       | 3.128        | 125       | 0.0022       |         |
|               | 47      | -1.811       | 122       | 0.0726       | 4.401        | 122       | 0.0000       | C       |

| Negative Group |         |              |           |              |              |           |              |         |
|----------------|---------|--------------|-----------|--------------|--------------|-----------|--------------|---------|
| Sub-Region     | Chn No. | t-val (IAPS) | df (IAPS) | p-val (IAPS) | t-val (TASK) | df (TASK) | p-val (TASK) | Remarks |
| LRPFC          | 1       | -0.477       | 131       | 0.3169       | -0.707       | 131       | 0.2404       |         |
| FP             | 2       | 2.299        | 137       | 0.0115       | -2.504       | 137       | 0.0067       |         |
|                | 3       | 2.398        | 128       | 0.0090       | -1.464       | 128       | 0.0729       |         |
|                | 4       | 2.791        | 140       | 0.0030       | -2.052       | 140       | 0.0210       |         |
|                | 5       | 5.396        | 140       | 0.0000       | -4.049       | 140       | 0.0000       | A,D     |
|                | 6       | 3.767        | 143       | 0.0001       | -5.187       | 143       | 0.0000       | A,D     |
|                | 7       | 4.756        | 143       | 0.0000       | -6.234       | 143       | 0.0000       | A,D     |
|                | 8       | 1.885        | 137       | 0.0308       | 0.531        | 137       | 0.2982       |         |
| LRPFC          | 9       | 1.733        | 134       | 0.0427       | 0.061        | 134       | 0.4756       |         |
|                | 10      | -2.090       | 137       | 0.0192       | 2.256        | 137       | 0.0128       |         |
|                | 11      | -1.342       | 128       | 0.0911       | 2.967        | 128       | 0.0018       |         |
| FP             | 12      | 2.147        | 128       | 0.0168       | -1.755       | 128       | 0.0408       |         |
|                | 13      | 2.059        | 137       | 0.0207       | -0.631       | 137       | 0.2646       |         |
|                | 14      | 2.769        | 140       | 0.0032       | -2.677       | 140       | 0.0042       |         |
|                | 15      | 4.311        | 137       | 0.0000       | -4.887       | 137       | 0.0000       | A,D     |
|                | 16      | 3.658        | 143       | 0.0002       | -3.948       | 143       | 0.0001       | A,D     |
|                | 17      | 5.289        | 137       | 0.0000       | -3.950       | 137       | 0.0001       | A,D     |
|                | 18      | -3.145       | 128       | 0.0010       | 4.172        | 128       | 0.0000       | B,C     |
| LRPFC          | 19      | 0.773        | 134       | 0.2205       | -0.072       | 134       | 0.4712       |         |
|                | 20      | -4.192       | 119       | 0.0000       | 4.711        | 119       | 0.0000       | B,C     |
|                | 21      | -1.958       | 128       | 0.0262       | 2.497        | 128       | 0.0069       |         |
| FP             | 22      | 1.966        | 143       | 0.0256       | -1.549       | 143       | 0.0618       |         |
|                | 23      | 0.883        | 143       | 0.1893       | -1.215       | 143       | 0.1131       |         |
|                | 24      | 2.411        | 143       | 0.0086       | -2.190       | 143       | 0.0151       |         |
|                | 25      | 3.695        | 143       | 0.0002       | -3.959       | 143       | 0.0001       | A,D     |
|                | 26      | 5.350        | 140       | 0.0000       | -4.220       | 140       | 0.0000       | A,D     |
|                | 27      | -2.982       | 137       | 0.0017       | 3.452        | 137       | 0.0004       | C       |
| LRPFC          | 28      | -3.042       | 116       | 0.0015       | 4.359        | 116       | 0.0000       | C       |
|                | 29      | -5.361       | 134       | 0.0000       | 4.745        | 134       | 0.0000       | B,C     |
|                | 30      | -4.232       | 116       | 0.0000       | 4.767        | 116       | 0.0000       | B,C     |
|                | 31      | -0.273       | 140       | 0.3927       | -0.299       | 140       | 0.3826       |         |
|                | 32      | 1.311        | 143       | 0.0961       | 0.718        | 143       | 0.2369       |         |
| FP             | 33      | 2.183        | 143       | 0.0153       | -2.424       | 143       | 0.0083       |         |
|                | 34      | 2.673        | 143       | 0.0042       | -2.828       | 143       | 0.0027       |         |
|                | 35      | 3.250        | 140       | 0.0007       | -1.636       | 140       | 0.0520       | A       |
|                | 36      | -0.087       | 137       | 0.4655       | 1.691        | 137       | 0.0466       |         |
| LRPFC          | 37      | -2.745       | 131       | 0.0035       | 3.691        | 131       | 0.0002       | C       |
|                | 38      | -3.008       | 122       | 0.0016       | 3.230        | 122       | 0.0008       | C       |
|                | 39      | -1.678       | 143       | 0.0478       | 1.839        | 143       | 0.0340       |         |
|                | 40      | -1.808       | 140       | 0.0363       | 2.034        | 140       | 0.0219       |         |
|                | 41      | 1.938        | 143       | 0.0273       | -0.789       | 143       | 0.2158       |         |
| FP             | 42      | 2.451        | 140       | 0.0077       | -2.389       | 140       | 0.0091       |         |
|                | 43      | 3.914        | 137       | 0.0001       | -5.061       | 137       | 0.0000       | A,D     |
|                | 44      | 3.602        | 140       | 0.0002       | -3.738       | 140       | 0.0001       | A,D     |
|                | 45      | 1.018        | 140       | 0.1552       | 1.149        | 140       | 0.1263       |         |
| LRPFC          | 46      | -1.753       | 134       | 0.0410       | 3.093        | 134       | 0.0012       |         |
|                | 47      | -1.007       | 140       | 0.1579       | 0.734        | 140       | 0.2321       |         |

**Remarks:**    \*A    OxyHb significantly activated during IAPS  
                       \*B    OxyHb significantly deactivated during IAPS  
                       \*C    OxyHb significantly activated during n-back task  
                       \*D    OxyHb significantly deactivated during n-back task

**Note:**        maximum degree of freedom (df, paired t-test) = N(test data)-1  
                       where N(neutral group) = 15subjects x 3WML x 3blocks = 135  
                               N(negative group) = 16subjects x 3WML x 3blocks = 144  
                       \* reduced df indicates elimination of fNIRS block-data from analysis in specific channel (see Method)

**Supplementary Figure S3 – fNIRS task OxyHb activation map - channel of interest (COI)**

|             | Cntr.<br>Subj. | Cntr. Subj. |                |     |     |     |   |     |   |   |    |     |     |    |    |     |    |     |     |     |     |     |    |    |    |    |    |    |    |    |    |    |    |    |    |    |    |    |    |    |    |    |    |    |    |    |    |    | Total PFC<br>act_chn | Act chn<br>ratio |      |      |
|-------------|----------------|-------------|----------------|-----|-----|-----|---|-----|---|---|----|-----|-----|----|----|-----|----|-----|-----|-----|-----|-----|----|----|----|----|----|----|----|----|----|----|----|----|----|----|----|----|----|----|----|----|----|----|----|----|----|----|----------------------|------------------|------|------|
|             |                | 1           | 2              | 3   | 4   | 5   | 6 | 7   | 8 | 9 | 10 | 11  | 12  | 13 | 14 | 15  | 16 | 17  | 18  | 19  | 20  | 21  | 22 | 23 | 24 | 25 | 26 | 27 | 28 | 29 | 30 | 31 | 32 | 33 | 34 | 35 | 36 | 37 | 38 | 39 | 40 | 41 | 42 | 43 | 44 | 45 | 46 | 47 |                      |                  |      |      |
| WML: 0-back | Neutral Group  | S1          | 0              | 1   | 1   | 1   | 1 | 1   | 1 | 1 | 1  | 1   | 1   | 1  | 1  | 1   | 1  | 1   | 1   | 1   | 1   | 1   | 1  | 1  | 1  | 1  | 1  | 1  | 1  | 1  | 1  | 1  | 1  | 1  | 1  | 1  | 1  | 1  | 1  | 1  | 1  | 1  | 1  | 1  | 1  | 1  | 1  | 1  | 2                    | 0.65             |      |      |
|             |                | S2          | 0              | 1   | 1   | 1   | 1 | 1   | 1 | 1 | 1  | 1   | 1   | 1  | 1  | 1   | 1  | 1   | 1   | 1   | 1   | 1   | 1  | 1  | 1  | 1  | 1  | 1  | 1  | 1  | 1  | 1  | 1  | 1  | 1  | 1  | 1  | 1  | 1  | 1  | 1  | 1  | 1  | 1  | 1  | 1  | 1  | 1  | 1                    | 41               | 0.87 |      |
|             |                | S3          | 1              | 1   | 1   | 1   | 1 | 1   | 1 | 1 | 1  | 1   | 1   | 1  | 1  | 1   | 1  | 1   | 1   | 1   | 1   | 1   | 1  | 1  | 1  | 1  | 1  | 1  | 1  | 1  | 1  | 1  | 1  | 1  | 1  | 1  | 1  | 1  | 1  | 1  | 1  | 1  | 1  | 1  | 1  | 1  | 1  | 1  | 1                    | 43               | 1.00 |      |
|             |                | S4          | 0              | 0   | 0   | 0   | 0 | 0   | 0 | 0 | 0  | 0   | 0   | 0  | 0  | 0   | 0  | 0   | 0   | 0   | 0   | 0   | 0  | 0  | 0  | 0  | 0  | 0  | 0  | 0  | 0  | 0  | 0  | 0  | 0  | 0  | 0  | 0  | 0  | 0  | 0  | 0  | 0  | 0  | 0  | 0  | 0  | 0  | 0                    | 2                | 0.05 |      |
|             |                | S5          | 0              | 0   | 0   | 1   | 1 | 1   | 1 | 1 | 1  | 0   | 0   | 0  | 0  | 0   | 0  | 0   | 0   | 0   | 0   | 0   | 0  | 0  | 0  | 0  | 0  | 0  | 0  | 0  | 0  | 0  | 0  | 0  | 0  | 0  | 0  | 0  | 0  | 0  | 0  | 0  | 0  | 0  | 0  | 0  | 0  | 0  | 0                    | 21               | 0.46 |      |
|             |                | S6          | 1              | 1   | 1   | NaH | 0 | 0   | 0 | 0 | 0  | 0   | 1   | 1  | 1  | 0   | 1  | 1   | 1   | 0   | 0   | 0   | 0  | 0  | 0  | 0  | 0  | 0  | 0  | 0  | 0  | 0  | 0  | 0  | 0  | 0  | 0  | 0  | 0  | 0  | 0  | 0  | 0  | 0  | 0  | 0  | 0  | 0  | 0                    | 27               | 0.59 |      |
|             |                | S7          | 0              | 0   | 0   | 0   | 0 | NaH | 0 | 0 | 0  | 0   | 0   | 0  | 0  | 0   | 0  | 0   | 0   | 0   | 0   | 0   | 0  | 0  | 0  | 0  | 0  | 0  | 0  | 0  | 0  | 0  | 0  | 0  | 0  | 0  | 0  | 0  | 0  | 0  | 0  | 0  | 0  | 0  | 0  | 0  | 0  | 0  | 19                   | 0.43             |      |      |
|             |                | S8          | 0              | 1   | 0   | 0   | 0 | 0   | 1 | 0 | 0  | 0   | 0   | 0  | 0  | 0   | 0  | 0   | 0   | 0   | 0   | 0   | 0  | 0  | 0  | 0  | 0  | 0  | 0  | 0  | 0  | 0  | 0  | 0  | 0  | 0  | 0  | 0  | 0  | 0  | 0  | 0  | 0  | 0  | 0  | 0  | 0  | 0  | 5                    | 0.11             |      |      |
|             |                | S9          | 1              | 1   | 1   | 1   | 1 | 1   | 1 | 1 | 1  | 1   | 0   | 1  | 1  | 1   | 1  | 1   | 1   | 1   | 0   | 0   | 0  | 0  | 0  | 0  | 0  | 0  | 0  | 0  | 0  | 0  | 0  | 0  | 0  | 0  | 0  | 0  | 0  | 0  | 0  | 0  | 0  | 0  | 0  | 0  | 0  | 0  | 26                   | 0.55             |      |      |
|             |                | S10         | 1              | 1   | 1   | 1   | 1 | 1   | 1 | 1 | 1  | 1   | 1   | 1  | 1  | 1   | 1  | 1   | 1   | 1   | 1   | 1   | 1  | 0  | 1  | 1  | 1  | 1  | 1  | 1  | 1  | 1  | 1  | 1  | 1  | 1  | 1  | 1  | 1  | 1  | 1  | 1  | 1  | 1  | 1  | 1  | 1  | 1  | 44                   | 0.94             |      |      |
|             |                | S11         | 1              | 1   | 0   | 1   | 1 | 1   | 1 | 1 | 1  | 1   | 1   | 0  | 1  | 1   | 1  | 1   | 1   | 1   | 0   | 1   | 1  | 1  | 0  | 1  | 1  | 1  | 1  | 1  | 0  | 1  | 1  | 1  | 1  | 1  | 1  | 1  | 1  | 1  | 1  | 1  | 1  | 1  | 1  | 1  | 1  | 1  | 1                    | 38               | 0.81 |      |
|             |                | S12         | 0              | 1   | 1   | 1   | 1 | 1   | 1 | 1 | 1  | 1   | 1   | 1  | 1  | 1   | 1  | 1   | 1   | 1   | 1   | 1   | 1  | 1  | 1  | 1  | 1  | 1  | 1  | 1  | 1  | 1  | 1  | 1  | 1  | 1  | 1  | 1  | 1  | 1  | 1  | 1  | 1  | 1  | 1  | 1  | 1  | 1  | 44                   | 0.94             |      |      |
|             |                | S13         | 0              | 0   | 1   | 1   | 1 | 1   | 1 | 1 | 1  | 1   | 0   | 1  | 1  | 1   | 1  | 1   | 1   | 0   | 1   | 1   | 1  | 0  | 1  | 0  | 1  | 0  | 1  | 0  | 1  | 0  | 1  | 0  | 1  | 0  | 1  | 0  | 1  | 0  | 1  | 0  | 1  | 0  | 1  | 0  | 1  | 0  | 24                   | 0.51             |      |      |
|             |                | S14         | 0              | 1   | 0   | 0   | 0 | 1   | 1 | 1 | 1  | 1   | 0   | 1  | 0  | 0   | 1  | 0   | 1   | 0   | 1   | 1   | 1  | 1  | 0  | 0  | 1  | 1  | 1  | 1  | 0  | 0  | 1  | 1  | 1  | 0  | 1  | 1  | 1  | 1  | 1  | 1  | 1  | 1  | 1  | 1  | 1  | 1  | 1                    | 35               | 0.74 |      |
|             |                | S15         | 0              | 1   | 1   | 1   | 1 | 1   | 1 | 1 | 1  | 1   | 1   | 1  | 1  | 1   | 1  | 1   | 1   | 1   | 1   | 1   | 1  | 0  | 1  | 1  | 1  | 1  | 1  | 0  | 0  | 0  | 1  | 1  | 1  | 1  | 1  | 1  | 1  | 1  | 1  | 1  | 1  | 1  | 1  | 1  | 1  | 1  | 39                   | 0.80             |      |      |
|             |                | WML: 1-back | Negative Group | S16 | 0   | 0   | 0 | 0   | 0 | 1 | 0  | NaH | 0   | 0  | 0  | 0   | 0  | 0   | 0   | 0   | 0   | 0   | 0  | 0  | 0  | 0  | 0  | 0  | 0  | 0  | 0  | 0  | 0  | 0  | 0  | 0  | 0  | 0  | 0  | 0  | 0  | 0  | 0  | 0  | 0  | 0  | 0  | 0  | 0                    | 0                | 6    | 0.13 |
|             |                |             |                | S17 | 1   | 1   | 0 | 1   | 1 | 1 | 1  | 1   | 1   | 1  | 1  | 1   | 0  | 1   | 1   | 0   | 0   | 0   | 0  | 0  | 0  | 0  | 0  | 0  | 0  | 0  | 0  | 0  | 0  | 0  | 0  | 0  | 0  | 0  | 0  | 0  | 0  | 0  | 0  | 0  | 0  | 0  | 0  | 0  | 0                    | 0                | 41   | 0.87 |
| S18         | 0              |             |                | 0   | 0   | 0   | 0 | 1   | 1 | 1 | 1  | 1   | 0   | 0  | 0  | 0   | 0  | 0   | 0   | 0   | 0   | 0   | 0  | 0  | 0  | 0  | 0  | 0  | 0  | 0  | 0  | 0  | 0  | 0  | 0  | 0  | 0  | 0  | 0  | 0  | 0  | 0  | 0  | 0  | 0  | 0  | 0  | 0  | 11                   | 0.23             |      |      |
| S19         | 0              |             |                | 0   | 0   | 0   | 0 | 1   | 0 | 0 | 0  | 0   | 0   | 0  | 0  | 0   | 0  | 0   | 0   | 0   | 0   | 0   | 0  | 0  | 0  | 0  | 0  | 0  | 0  | 0  | 0  | 0  | 0  | 0  | 0  | 0  | 0  | 0  | 0  | 0  | 0  | 0  | 0  | 0  | 0  | 0  | 0  | 0  | 4                    | 0.09             |      |      |
| S20         | 0              |             |                | 0   | 1   | 1   | 1 | 0   | 0 | 0 | 0  | 0   | 1   | 1  | 0  | 1   | 1  | 0   | 0   | 0   | 0   | 0   | 0  | 0  | 0  | 0  | 0  | 0  | 0  | 0  | 0  | 0  | 0  | 0  | 0  | 0  | 0  | 0  | 0  | 0  | 0  | 0  | 0  | 0  | 0  | 0  | 0  | 0  | 22                   | 0.47             |      |      |
| S21         | 0              |             |                | 0   | 0   | 0   | 0 | 0   | 0 | 0 | 0  | 0   | 0   | 0  | 0  | 0   | 0  | 0   | 0   | 0   | 0   | 0   | 0  | 0  | 0  | 0  | 0  | 0  | 0  | 0  | 0  | 0  | 0  | 0  | 0  | 0  | 0  | 0  | 0  | 0  | 0  | 0  | 0  | 0  | 0  | 0  | 0  | 0  | 4                    | 0.09             |      |      |
| S22         | 1              |             |                | 1   | NaH | 0   | 0 | 0   | 0 | 0 | 0  | 1   | NaH | 0  | 0  | NaH | 0  | NaH | NaH | NaH | NaH | 0   | 0  | 0  | 0  | 0  | 0  | 0  | 0  | 0  | 0  | 0  | 0  | 0  | 0  | 0  | 0  | 0  | 0  | 0  | 0  | 0  | 0  | 0  | 0  | 0  | 0  | 18 | 0.46                 |                  |      |      |
| S23         | 1              |             |                | 1   | 1   | 1   | 1 | 1   | 1 | 1 | 1  | 1   | 1   | 1  | 1  | 1   | 1  | 1   | 1   | 1   | 1   | 1   | 1  | 1  | 1  | 1  | 1  | 1  | 1  | 1  | 1  | 1  | 1  | 1  | 1  | 1  | 1  | 1  | 1  | 1  | 1  | 1  | 1  | 1  | 1  | 1  | 1  | 0  | 40                   | 0.87             |      |      |
| S24         | 1              |             |                | NaH | 0   | 1   | 1 | 1   | 1 | 0 | 0  | 1   | NaH | 0  | 0  | 1   | 1  | 1   | 1   | 1   | 1   | 1   | 1  | 0  | 0  | 0  | 0  | 0  | 0  | 0  | 0  | 0  | 0  | 0  | 0  | 0  | 0  | 0  | 0  | 0  | 0  | 0  | 0  | 0  | 0  | 0  | 0  | 0  | 33                   | 0.73             |      |      |
| S25         | NaH            |             |                | NaH | 0   | 0   | 0 | 0   | 0 | 0 | 0  | 0   | 0   | 0  | 0  | 0   | 0  | 0   | 0   | 0   | 0   | 0   | 0  | 0  | 0  | 0  | 0  | 0  | 0  | 0  | 0  | 0  | 0  | 0  | 0  | 0  | 0  | 0  | 0  | 0  | 0  | 0  | 0  | 0  | 0  | 0  | 0  | 6  | 0.13                 |                  |      |      |
| S26         | 0              |             |                | 0   | 0   | 1   | 0 | 0   | 0 | 1 | 0  | NaH | 0   | 0  | 0  | 0   | 1  | 1   | 1   | 1   | NaH | NaH | 0  | 0  | 0  | 0  | 0  | 0  | 0  | 0  | 0  | 0  | 0  | 0  | 0  | 0  | 0  | 0  | 0  | 0  | 0  | 0  | 0  | 0  | 0  | 0  | 0  | 0  | 24                   | 0.56             |      |      |
| S27         | 1              |             |                | 0   | 1   | 0   | 0 | 0   | 0 | 1 | 1  | 1   | 1   | 1  | 0  | 1   | 1  | 1   | 1   | 1   | 1   | 1   | 1  | 1  | 1  | 1  | 1  | 1  | 1  | 1  | 1  | 1  | 1  | 1  | 1  | 1  | 1  | 1  | 1  | 1  | 1  | 1  | 1  | 1  | 1  | 1  | 1  | 1  | 41                   | 0.87             |      |      |
| S28         | 0              |             |                | 0   | 0   | 0   | 0 | 0   | 0 | 0 | 0  | 0   | 0   | 0  | 0  | 0   | 0  | 0   | 0   | 0   | 0   | 0   | 0  | 0  | 0  | 0  | 0  | 0  | 0  | 0  | 0  | 0  | 0  | 0  | 0  | 0  | 0  | 0  | 0  | 0  | 0  | 0  | 0  | 0  | 0  | 0  | 0  | 0  | 12                   | 0.26             |      |      |
| S29         | 1              |             |                | 0   | 1   | 1   | 1 | 1   | 1 | 1 | 1  | 1   | 1   | 1  | 0  | 1   | 1  | 1   | 1   | 1   | 1   | 1   | 1  | 1  | 1  | 1  | 1  | 1  | 1  | 1  | 1  | 1  | 1  | 1  | 1  | 1  | 1  | 1  | 1  | 1  | 1  | 1  | 1  | 1  | 1  | 1  | 1  | 1  | 27                   | 0.57             |      |      |
| S30         | 0              |             |                | 1   | 1   | 1   | 1 | 1   | 1 | 1 | 1  | 1   | 0   | 0  | 1  | 1   | 1  | 1   | 1   | 1   | 1   | 1   | 1  | 0  | 0  | 0  | 0  | 0  | 0  | 0  | 0  | 0  | 0  | 0  | 0  | 0  | 0  | 0  | 0  | 0  | 0  | 0  | 0  | 0  | 0  | 0  | 0  | 0  | 31                   | 0.70             |      |      |
| S31         | 0              |             |                | 0   | 1   | 1   | 1 | 1   | 1 | 1 | 1  | 1   | 0   | 1  | 1  | 1   | 1  | 1   | 1   | 1   | 1   | 1   | 1  | 0  | 0  | 0  | 0  | 0  | 0  | 0  | 0  | 0  | 0  | 0  | 0  | 0  | 0  | 0  | 0  | 0  | 0  | 0  | 0  | 0  | 0  | 0  | 0  | 0  | 32                   | 0.70             |      |      |
| WML: 1-back | Neutral Group  |             |                | S1  | 1   | 1   | 1 | 1   | 1 | 1 | 1  | 0   | 0   | 1  | 1  | 1   | 1  | 1   | 1   | 0   | 0   | 0   | 0  | 0  | 0  | 0  | 0  | 0  | 0  | 0  | 0  | 0  | 0  | 0  | 0  | 0  | 0  | 0  | 0  | 0  | 0  | 0  | 0  | 0  | 0  | 0  | 0  | 0  | 0                    | 38               | 0.81 |      |
|             |                | S2          | 1              | 1   | 1   | 1   | 1 | 1   | 1 | 1 | 0  | 0   | 0   | 1  | 1  | 1   | 1  | 1   | 1   | 0   | 0   | 0   | 0  | 0  | 0  | 0  | 0  | 0  | 0  | 0  | 0  | 0  | 0  | 0  | 0  | 0  | 0  | 0  | 0  | 0  | 0  | 0  | 0  | 0  | 0  | 0  | 0  | 30 | 0.64                 |                  |      |      |
|             |                | S3          | 1              | 1   | 1   | 1   | 1 | 1   | 1 | 1 | 1  | 0   | 1   | 1  | 1  | 1   | 1  | 1   | 0   | NaH | 0   | 0   | 0  | 0  | 0  | 0  | 0  | 0  | 0  | 0  | 0  | 0  | 0  | 0  | 0  | 0  | 0  | 0  | 0  | 0  | 0  | 0  | 0  | 0  | 0  | 0  | 0  | 40 | 0.89                 |                  |      |      |
|             |                | S4          | 0              | 0   | 1   | 1   | 1 | 1   | 0 | 0 | 0  | 0   | 0   | 0  | 0  | 0   | 0  | 0   | 0   | 0   | 0   | 0   | 0  | 0  | 0  | 0  | 0  | 0  | 0  | 0  | 0  | 0  | 0  | 0  | 0  | 0  | 0  | 0  | 0  | 0  | 0  | 0  | 0  | 0  | 0  | 0  | 0  | 29 | 0.63                 |                  |      |      |
|             |                | S5          | 1              | 1   | 1   | 1   | 1 | 1   | 0 | 0 | 0  | 0   | 0   | 0  | 0  | 0   | 0  | 0   | 0   | 0   | 0   | 0   | 0  | 0  | 0  | 0  | 0  | 0  | 0  | 0  | 0  | 0  | 0  | 0  | 0  | 0  | 0  | 0  | 0  | 0  | 0  | 0  | 0  | 0  | 0  | 0  | 0  | 37 | 0.80                 |                  |      |      |
|             |                | S6          | 0              | 1   | NaH | 0   | 1 | 1   | 1 | 0 | 0  | 0   | 0   | 0  | 0  | 0   | 0  | 0   | 0   | 0   | 0   | 0   | 0  | 0  | 0  | 0  | 0  | 0  | 0  | 0  | 0  | 0  | 0  | 0  | 0  | 0  | 0  | 0  | 0  | 0  | 0  | 0  | 0  | 0  | 0  | 0  | 0  | 21 | 0.46                 |                  |      |      |
|             |                | S7          | 1              | 1   | 1   | NaH | 0 | 0   | 0 | 0 | 0  | 0   | 0   | 0  | 0  | 0   | 0  | 0   | 0   | 0   | 0   | 0   | 0  | 0  | 0  | 0  | 0  | 0  | 0  | 0  | 0  | 0  | 0  | 0  | 0  | 0  | 0  | 0  | 0  | 0  | 0  | 0  | 0  | 0  | 0  | 0  | 0  | 40 | 0.87                 |                  |      |      |
|             |                | S8          | 1              | 1   | 0   | 0   | 0 | 1   | 1 | 1 | 0  | 0   | 0   | 0  | 0  | 0   | 0  | 0   | 0   | 0   | 0   | 0   | 0  | 0  | 0  | 0  | 0  | 0  | 0  | 0  | 0  | 0  | 0  | 0  | 0  | 0  | 0  | 0  | 0  | 0  | 0  | 0  | 0  | 0  | 0  | 0  | 0  | 20 | 0.43                 |                  |      |      |
|             |                | S9          | 1              | 1   | 1   | 1   | 1 | 1   | 0 | 0 | 0  | 0   | 0   | 0  | 0  | 0   | 0  | 0   | 0   | 0   |     |     |    |    |    |    |    |    |    |    |    |    |    |    |    |    |    |    |    |    |    |    |    |    |    |    |    |    |                      |                  |      |      |

**Legend:**

|     |                                                                     |
|-----|---------------------------------------------------------------------|
| 0   | No significant activation                                           |
| 1   | Significant activated channel (OxyHb Task vs. Rest, $p < 0.05/47$ ) |
| NaN | Channel removed from analysis                                       |

**Supplementary Table S3**– Statistical comparisons for haemodynamic activity area and intensity across PFC regions

| T-test for Area of Activation between CG and EG |        |               |       |                    |                      |                     |                     |
|-------------------------------------------------|--------|---------------|-------|--------------------|----------------------|---------------------|---------------------|
| Region                                          | WML    | Levene's test |       | Independent t-test |                      |                     | Effect Size         |
|                                                 |        | F             | Sig   | t                  | df                   | Sig (2-tailed)      | d                   |
| PFC                                             | 0-back | 0.008         | 0.928 | 1.615              | 29                   | 0.117               | 0.580 <sup>^</sup>  |
|                                                 | 1-back | 2.711         | 0.11  | 2.008              | 29                   | 0.054               | 0.722 <sup>^</sup>  |
|                                                 | 2-back | 0.469         | 0.499 | 1.785              | 29                   | 0.085               | 0.642 <sup>^</sup>  |
| FP                                              | 0-back | 0.773         | 0.387 | 1.825              | 29                   | 0.078               | 0.656 <sup>^</sup>  |
|                                                 | 1-back | 5.363         | 0.028 | 2.656              | 26.012 <sup>#1</sup> | 0.013 <sup>*B</sup> | 0.942 <sup>^^</sup> |
|                                                 | 2-back | 0.198         | 0.659 | 1.186              | 29                   | 0.245               | 0.426               |
| LRPFC                                           | 0-back | 0.034         | 0.855 | 0.882              | 29                   | 0.385               | 0.317               |
|                                                 | 1-back | 1.090         | 0.305 | 0.457              | 29                   | 0.651               | 0.164               |
|                                                 | 2-back | 2.249         | 0.144 | 1.82               | 29                   | 0.079               | 0.654 <sup>^</sup>  |

| T-test for OxyHb Intensity between CG and EG |        |               |       |                    |    |                     |                     |
|----------------------------------------------|--------|---------------|-------|--------------------|----|---------------------|---------------------|
| Region                                       | WML    | Levene's test |       | Independent t-test |    |                     | Effect Size         |
|                                              |        | F             | Sig   | t                  | df | Sig (2-tailed)      | d                   |
| PFC                                          | 0-back | 0.623         | 0.437 | -0.063             | 29 | 0.950               | 0.023               |
|                                              | 1-back | 0.543         | 0.467 | 1.070              | 29 | 0.294               | 0.385               |
|                                              | 2-back | 3.405         | 0.075 | 2.116              | 29 | 0.043 <sup>*</sup>  | 0.760 <sup>^</sup>  |
| FP                                           | 0-back | 1.789         | 0.191 | 1.707              | 29 | 0.099               | 0.613 <sup>^</sup>  |
|                                              | 1-back | 0.015         | 0.902 | -1.586             | 28 | 0.080               | 0.663 <sup>^</sup>  |
|                                              | 2-back | 0.004         | 0.949 | 2.592              | 29 | 0.015 <sup>*B</sup> | 0.932 <sup>^^</sup> |
| LRPFC                                        | 0-back | 0.703         | 0.409 | -0.287             | 24 | 0.776               | 0.202               |
|                                              | 1-back | 0.137         | 0.714 | 1.247              | 27 | 0.222               | 0.290               |
|                                              | 2-back | 2.043         | 0.164 | 1.873              | 26 | 0.071               | 0.583 <sup>^</sup>  |

**Annotations :**

#1. Correction on the degrees of freedom through Welch-Satterthwaite method as the Levene's test indicated that homogeneity of variances was not assumed. Statistical comparison using independent t-test with unequal variances.

<sup>\*B</sup> Significant different after Bonferroni's correction applied for multi-WMLs comparison ( $\alpha = 0.0167$ )

<sup>\*</sup> Significant different ( $\alpha = 0.05$ )

<sup>^</sup> Medium effect size ( $d > 0.5$ )

<sup>^^</sup> Large effect size ( $d > 0.8$ )

**Supplementary Table S4** – Statistical comparisons of temporal OxyHb features in DLPFC across WML and affective states

| Time to Peak between CG and EG |          |              |                       |                     |
|--------------------------------|----------|--------------|-----------------------|---------------------|
| WML                            | U-test   |              |                       | Effect Size         |
|                                | <u>U</u> | <u>z-val</u> | <u>Sig (2-tailed)</u> | <u>d</u>            |
| <i>0-back</i>                  | 84       | −0.026       | 1.000                 | −0.038              |
| <i>1-back</i>                  | 50       | −2.400       | 0.016 <sup>*B</sup>   | 1.105 <sup>^^</sup> |
| <i>2-back</i>                  | 53       | −2.050       | 0.041 <sup>*</sup>    | 0.834 <sup>^</sup>  |

  

| Area Under Curve between CG and EG |          |              |                       |                    |
|------------------------------------|----------|--------------|-----------------------|--------------------|
| WML                                | U-test   |              |                       | Effect Size        |
|                                    | <u>U</u> | <u>z-val</u> | <u>Sig (2-tailed)</u> | <u>d</u>           |
| <i>0-back</i>                      | 102      | 0.897        | 0.390                 | −0.297             |
| <i>1-back</i>                      | 110      | 0.218        | 0.847                 | −0.081             |
| <i>2-back</i>                      | 60       | −1.727       | 0.088                 | 0.676 <sup>^</sup> |

**Annotations:**

<sup>\*B</sup> Significant different after Bonferroni's correction applied for multi-WMLs comparison ( $\alpha = 0.0167$ )

<sup>\*</sup> Significant different ( $\alpha = 0.05$ )

<sup>^</sup> Medium effect size ( $d > 0.5$ )

<sup>^^</sup> Large effect size ( $d > 0.8$ )
